# Supplementary material for: DPP8 Selective Inhibitor Tominostat as a Novel and Broad-Spectrum Anticancer Agent against Hematological Malignancies
Source: MDPI journal article supplement (doi:10.3390/cells12071100), 2023-04-06
Supplement: s1 [file s1]

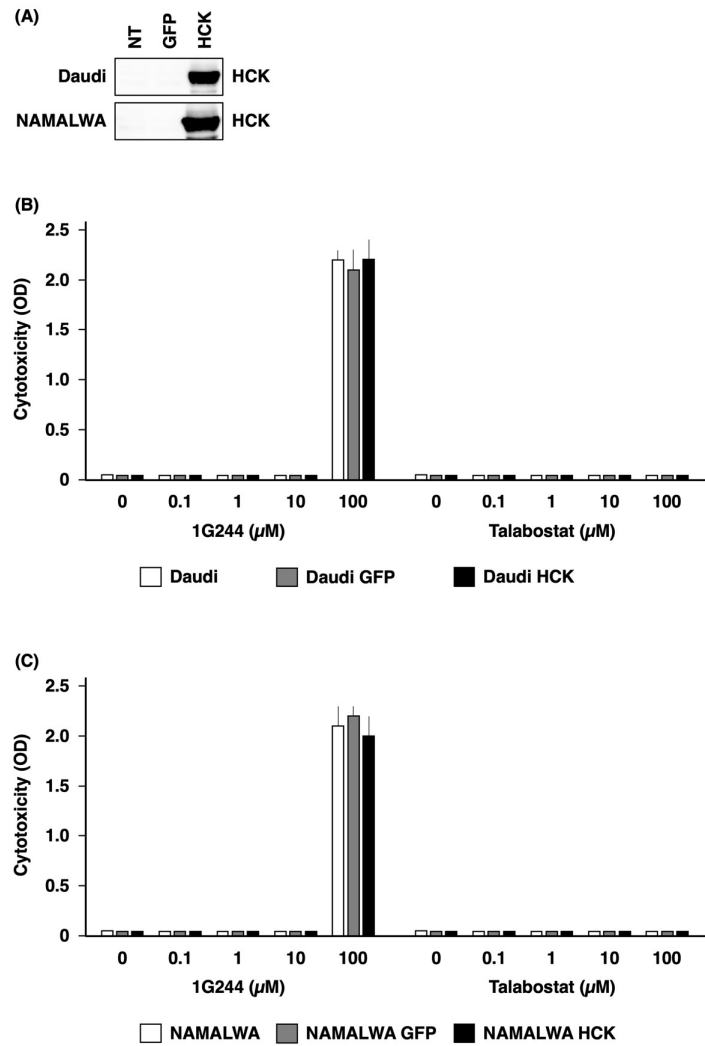

**Figure S1:** Effect of forced expression of HCK in resistant cell lines on DPP8/9 inhibitor-induced cytotoxicity. (A) The forced overexpression of HCK in Daudi and NAMALWA cells was estimated by Western blot analysis. NT, no treatment; GFP, control vector. (B and C)  $1.0 \times 10^5$  of Daudi or NAMALWA cells and their transfectants were cultured with DPP8/9 inhibitors (1G244 or talabostat) at doses of 0-100  $\mu\text{M}$  for 6 hours. Cytotoxicity was estimated by a LDH release assay (n=6).

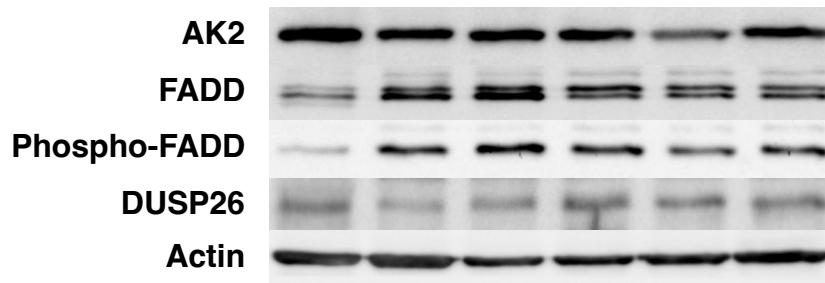

**Figure S2:** Expression of AK2-mediated apoptosis-inducing factors. Expression level of AK2, FADD, phosphor-FADD, and DUSP26 in THP-1, MM.1S, KARPAS299, KG1, NAMALWA, or Daudi cells was estimated by Western blot analysis.
